# Supplementary material for: Detection of human immunoglobulin G by label-free electrochemical immunoassay modified with ultralong CuS nanowires
Source: Royal Society of Chemistry journal article supplement (doi:10.1039/c4tb01881h), 2015-01-01
Supplement: c4tb01881h1.pdf [file c4tb01881h1.pdf]

## Supporting Information

### **Detection of human immunoglobulin G by label-free electrochemical immunoassay modified with ultralong CuS nanowires**

*Ning Wang<sup>a</sup>, Caizhen Gao<sup>a, b</sup>, Yu Han<sup>a, b</sup>, Xiaomin Huang<sup>a, b</sup>, Ying Xu<sup>a, b</sup>, and Xia Cao<sup>b, c\*</sup>*

<sup>a</sup> School of Chemistry and Environment, Beijing University of Aeronautics and Astronautics, Beijing, 100191, China.

<sup>b</sup> Beijing Institute of Nanoenergy and Nanosystems Chinese Academy of Science, Beijing, 100083, China.

<sup>c</sup> School of Chemistry and Biological Engineering, University of Science and Technology Beijing, Beijing, 100083, China.

## Table of Contents

|     |                                             |    |
|-----|---------------------------------------------|----|
| I.  | <i>TEM images of CuS nanowires.</i>         | S3 |
| II. | <i>Detection limit of the immunosensor.</i> | S4 |

## I. TEM images of CuS nanowires

Transmission electron microscopy (TEM) was utilized to demonstrate the stability of CuS nanowires after long-time rinse and ultrasonication both in water and organic solvents.

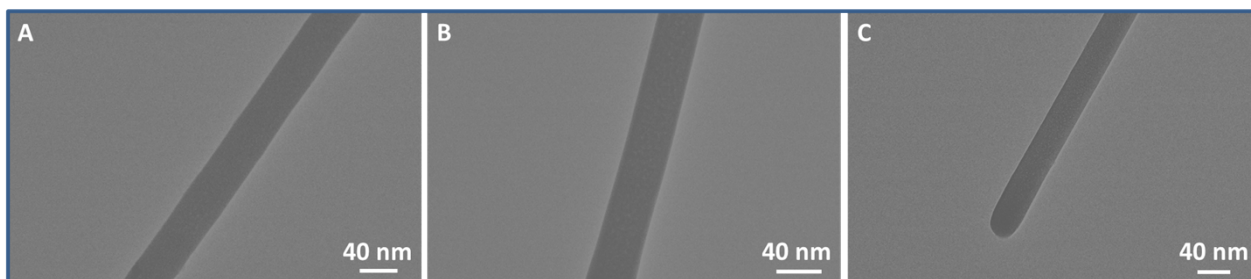

**Figure S1.** TEM images of CuS NW (A) Without ultrasonication after rinse for three times. (B) With ultrasonication after rinse for three times. (C) After long-time rinse and ultrasonication both in water and organic solvents.

## II. Detection limit of the immunosensor

Based on  $S/N = 3$ , a detection limit (0.1 pg/mL) of the proposed immunosensor was obtained.

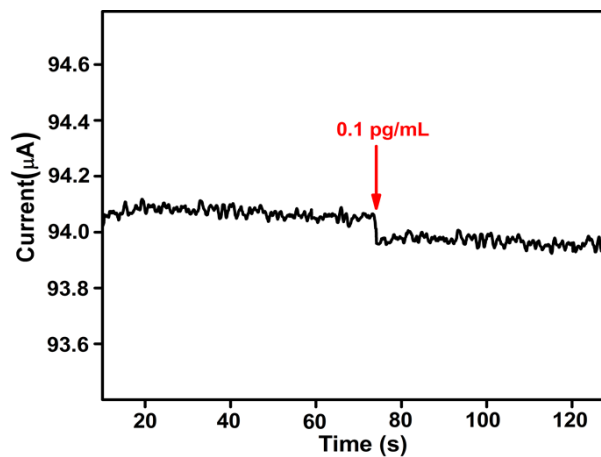

**Figure S2.** Determination limit of the proposed immunosensor shown by the chronoamperometric curve of the CuS/anti-IgG electrode with addition of 0.1 pg/mL IgG at a fixed potential of 0.01 V.
